# Supplementary material for: Ferromagnetism with strong magnetocrystalline anisotropy in A-site ordered perovskite YBaCo2O6 epitaxial thin films prepared via wet-chemical topotactic oxidation
Source: Royal Society of Chemistry journal article supplement (doi:10.1039/c7tc05422j), 2018-01-01
Supplement: c7tc05422j1.pdf [file c7tc05422j1.pdf]

## Supplementary Information

# **Ferromagnetism with strong magnetocrystalline anisotropy in *A*-site ordered perovskite YBaCo<sub>2</sub>O<sub>6</sub> epitaxial thin film prepared via wet-chemical topotactic oxidation**

Tsukasa Katayama,<sup>a,b</sup> Akira Chikamatsu,<sup>a,\*</sup> Yasushi Hirose,<sup>a</sup> Makoto Minohara,<sup>c</sup> Hiroshi Kumigashira,<sup>c</sup> Isao Harayama,<sup>d</sup> Daiichiro Sekiba,<sup>d</sup> and Tetsuya Hasegawa<sup>a</sup>

<sup>a</sup>*Department of Chemistry, The University of Tokyo, 7-3-1 Hongo, Bunkyo-ku, Tokyo 113-0033, Japan*

<sup>b</sup>*Laboratory for Materials and Structures, Tokyo Institute of Technology, 4259 Nagatsuta, Midori-ku, Yokohama 226-8503, Japan*

<sup>c</sup>*Institute of Materials Structure Science, High Energy Accelerator Research Organization (KEK), 1-1 Oho, Tsukuba, Ibaraki 305-0801, Japan*

<sup>d</sup>*Tandem Accelerator Complex, University of Tsukuba, 1-1-1 Tennoudai, Tsukuba, Ibaraki 305-8577, Japan*

\*E-mail: chikamatsu@chem.s.u-tokyo.ac.jp

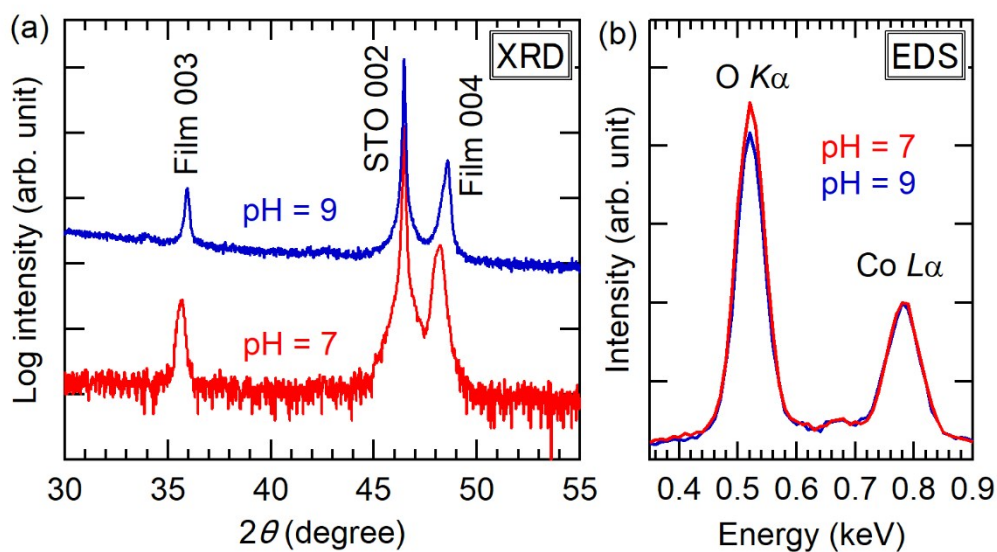

**Figure S1.** (a)  $2\theta$ - $\theta$  XRD patterns and (b) EDS spectra of the NaClO-treated YBaCo<sub>2</sub>O<sub>x</sub> film with pH-7 and 9 NaClO solution at 80 °C for 40 h. The  $x$  value reaches 6.0 when reacting with the NaClO solution with a pH of 7 at 80 °C for 40 h, while  $x$  is smaller than 5.7 when pH = 9, reacting at 80 °C for 40 h.

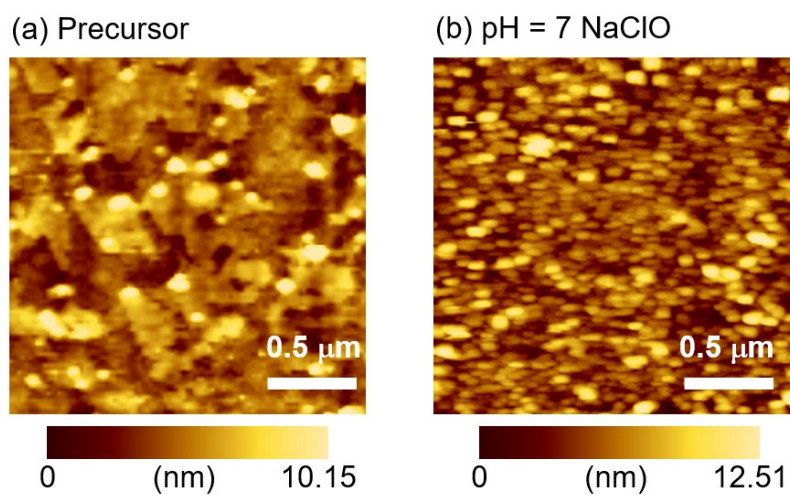

**Figure S2.** AFM images for the (a) precursor and (b) oxidized films. The oxidized film is prepared with pH-7 NaClO solution at 80 °C for 40 h. The root-mean-square of surface roughness for the oxidized film (2.1 nm) is somewhat larger than that for the precursor film (1.6 nm), showing that the surface morphology became rougher through the oxidation process.

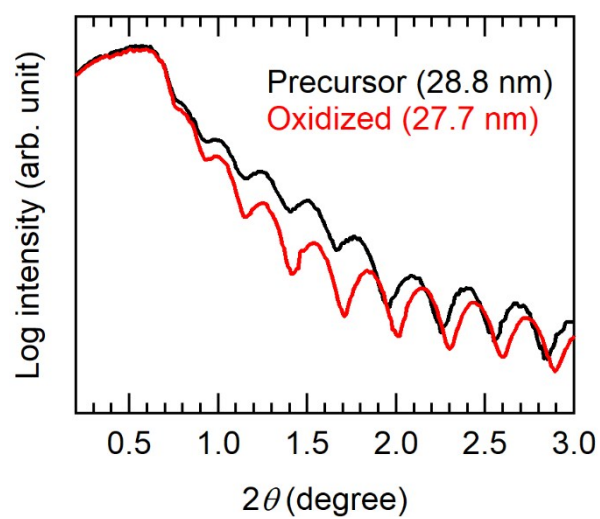

**Figure S3.** XRR profiles of the precursor  $\text{YBaCo}_2\text{O}_{5.3}$  and oxidized  $\text{YBaCo}_2\text{O}_6$  films. The thickness of the oxidized film is 27.7 nm, which is shorter than that of the precursor film (28.8 nm).

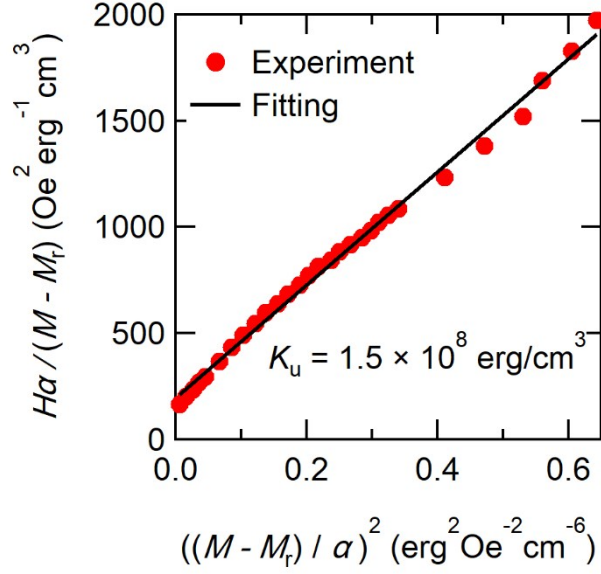

**Figure S4.**  $H\alpha/(M - M_r)$  plotted against  $((M - M_r)/\alpha)^2$  for the YBaCo<sub>2</sub>O<sub>6</sub> film at 5 K under  $H$  along [001] direction. The dots represent the experimental data and the solid line is the result of the curve-fitting.

The  $K_u$  of the YBaCo<sub>2</sub>O<sub>6</sub> film at 5 K was evaluated using the modified Sucksmith–Thompson method,<sup>38,39</sup> in which  $K_u$  is expressed as the sum of  $K_1$  and  $K_2$  given by the following equation:

$$\frac{H\alpha}{(M - M_r)} = \frac{2K_1}{M_s^2} + \frac{4K_2(M - M_r)^2}{\alpha^2 M_s^4}$$

where  $\alpha$  is  $(M_s - M_r) / M_s$ ,  $H$  is the magnetic field,  $M$  is the magnetization of the sample measured by applying  $H$  perpendicular to the easy axis of magnetization,  $M_r$  is the remanent magnetization, and  $M_s$  is the saturation magnetization. In the plot, the slope and intercept represent  $2K_1/M_s^2$  and  $4K_2/M_s^4$ , respectively. From the plot,  $K_u$  at 5 K of the YBaCo<sub>2</sub>O<sub>6</sub> film was evaluated to be  $1.5 \times 10^8$  erg/cm<sup>3</sup>.

## References

38. U. S. Ram and P. Gaunt, *J. Appl. Phys.*, 1983, **54**, 2872–2874.
39. S. Okamoto, N. Kikuchi, O. Kitakami, T. Miyazaki, Y. Shimada and K. Fukamichi, *Phys. Rev. B*, 2002, **66**, 024413.
